# Supplementary material
Source: publisher figshare collection journal article supplement (https://rs.figshare.com/ndownloader/files/12818507)
Supplement: Supplementary file 1 [file 12818507]

## Sheet: bivalve
Bivalves						Gastropods
Family_1	Family_2	Z	P.unadj	P.adj		Family_1	Family_2	Z	P.unadj	P.adj
Carditidae	Pectinidae	-3.88572	0.000102028	0.01744674*		Drilliidae	Turbinellidae	-4.82479	1.40151e-06	0.0004554896*
Carditidae	Pinnidae	-3.54915	0.000386476	0.0660873		Naticidae	Turbinellidae	-4.50807	6.54209e-06	0.002126178*
Lucinidae	Pectinidae	-3.13845	0.00169844	0.290434		Mangeliidae	Turbinellidae	-4.46945	7.84207e-06	0.002548672*
Lucinidae	Pinnidae	-3.02493	0.00248689	0.425259		Drilliidae	Fasciolariidae	-4.10791	3.99252e-05	0.012975685*
Pinnidae	Semelidae	2.97665	0.00291415	0.49832		Muricidae	Turbinellidae	-4.00664	6.15886e-05	0.0200162773*
Pectinidae	Tellinidae	2.96239	0.00305262	0.521999		Turbinellidae	Turbinidae	3.945	7.98002e-05	0.02593507*
Pinnidae	Tellinidae	2.9282	0.00340929	0.582989		Fasciolariidae	Mangeliidae	3.79948	0.000145	0.0471250245*
Carditidae	Spondylidae	-2.92048	0.00349496	0.597638		Nassariidae	Turbinellidae	-3.79094	0.000150078	0.0487752728*
Pectinidae	Semelidae	2.87132	0.00408758	0.698977		Drilliidae	Strombidae	-3.75967	0.00017014	0.0552954
Anomiidae	Arcidae	-0.268924	0.787988	1		Drilliidae	Turritellidae	-3.75392	0.000174089	0.0565789
Anomiidae	Astartidae	0.478937	0.631983	1		Fasciolariidae	Naticidae	3.68967	0.000224541	0.0729758
Arcidae	Astartidae	0.766029	0.443659	1		Liotiidae	Turbinellidae	-3.67106	0.000241547	0.0785029
Anomiidae	Cardiidae	-0.487136	0.626162	1		Mangeliidae	Strombidae	-3.61076	0.000305298	0.0992218
Arcidae	Cardiidae	-0.475562	0.634386	1		Mangeliidae	Turritellidae	-3.50635	0.0004543	0.147648
Astartidae	Cardiidae	-0.923008	0.356003	1		Buccinidae	Turbinellidae	-3.49373	0.000476326	0.154806
Anomiidae	Carditidae	0.79216	0.428268	1		Naticidae	Turritellidae	-3.2527	0.00114314	0.371521
Arcidae	Carditidae	2.16129	0.0306728	1		Naticidae	Strombidae	-3.23944	0.00119765	0.389236
Astartidae	Carditidae	0.0177221	0.985861	1		Calyptraeidae	Turbinellidae	-3.23312	0.00122446	0.39795
Cardiidae	Carditidae	2.50898	0.012108	1		Fasciolariidae	Turbinidae	3.19109	0.00141738	0.460648
Anomiidae	Chamidae	-0.743423	0.457226	1		Conidae	Drilliidae	3.1025	0.00191891	0.623647
Arcidae	Chamidae	-0.833881	0.404348	1		Fasciolariidae	Muricidae	3.04372	0.00233676	0.759447
Astartidae	Chamidae	-1.10327	0.269911	1		Fasciolariidae	Liotiidae	3.03618	0.00239596	0.778686
Cardiidae	Chamidae	-0.494366	0.621047	1		Fasciolariidae	Nassariidae	3.02571	0.00248052	0.806168
Carditidae	Chamidae	-2.30516	0.0211577	1		Strombidae	Turbinidae	3.01925	0.00253403	0.823559
Anomiidae	Crassatellidae	-0.31926	0.749529	1		Liotiidae	Strombidae	-2.98342	0.00285045	0.926396
Arcidae	Crassatellidae	-0.145923	0.883982	1		Cassidae	Drilliidae	2.96797	0.00299776	0.974271
Astartidae	Crassatellidae	-0.760387	0.447023	1		Architectonicidae	Buccinidae	-0.149181	0.88141	1
Cardiidae	Crassatellidae	0.118995	0.90528	1		Architectonicidae	Bullidae	-0.580373	0.561663	1
Carditidae	Crassatellidae	-1.3888	0.164894	1		Buccinidae	Bullidae	-0.636647	0.524355	1
Chamidae	Crassatellidae	0.452622	0.650821	1		Architectonicidae	Calyptraeidae	-0.0428367	0.965832	1
Anomiidae	Glycymerididae	0.045498	0.96371	1		Buccinidae	Calyptraeidae	0.215846	0.829108	1
Arcidae	Glycymerididae	0.556374	0.577955	1		Bullidae	Calyptraeidae	0.71705	0.473343	1
Astartidae	Glycymerididae	-0.519117	0.603679	1		Architectonicidae	Cancellariidae	-0.426437	0.669789	1
Cardiidae	Glycymerididae	0.919767	0.357695	1		Buccinidae	Cancellariidae	-0.549702	0.582524	1
Carditidae	Glycymerididae	-1.24673	0.212496	1		Bullidae	Cancellariidae	0.307683	0.758324	1
Chamidae	Glycymerididae	1.15414	0.248443	1		Calyptraeidae	Cancellariidae	-0.666932	0.504816	1
Crassatellidae	Glycymerididae	0.483621	0.628655	1		Architectonicidae	Cassidae	-0.904155	0.365913	1
Anomiidae	Limidae	-0.547646	0.583935	1		Buccinidae	Cassidae	-1.46446	0.143068	1
Arcidae	Limidae	-0.509864	0.610147	1		Bullidae	Cassidae	-0.170035	0.864982	1
Astartidae	Limidae	-0.95374	0.340215	1		Calyptraeidae	Cassidae	-1.49436	0.135081	1
Cardiidae	Limidae	-0.177172	0.859373	1		Cancellariidae	Cassidae	-0.755338	0.450046	1
Carditidae	Limidae	-1.99743	0.0457781	1		Architectonicidae	Conidae	-0.614695	0.538756	1
Chamidae	Limidae	0.258988	0.795644	1		Buccinidae	Conidae	-1.19246	0.233081	1
Crassatellidae	Limidae	-0.228332	0.819388	1		Bullidae	Conidae	0.178245	0.858531	1
Glycymerididae	Limidae	-0.866819	0.386041	1		Calyptraeidae	Conidae	-1.20914	0.226608	1
Anomiidae	Lucinidae	0.289599	0.772123	1		Cancellariidae	Conidae	-0.281329	0.778458	1
Arcidae	Lucinidae	1.21552	0.224167	1		Cassidae	Conidae	0.660743	0.508777	1
Astartidae	Lucinidae	-0.358348	0.720083	1		Architectonicidae	Drilliidae	0.894702	0.370946	1
Cardiidae	Lucinidae	1.62467	0.104234	1		Buccinidae	Drilliidae	2.10604	0.0352011	1
Carditidae	Lucinidae	-1.01556	0.30984	1		Bullidae	Drilliidae	1.64396	0.100184	1
Chamidae	Lucinidae	1.63793	0.101436	1		Calyptraeidae	Drilliidae	1.69499	0.0900777	1
Crassatellidae	Lucinidae	0.808456	0.418828	1		Cancellariidae	Drilliidae	2.17177	0.0298729	1
Glycymerididae	Lucinidae	0.418532	0.675558	1		Architectonicidae	Fasciolariidae	-1.18295	0.236831	1
Limidae	Lucinidae	1.31823	0.187426	1		Buccinidae	Fasciolariidae	-2.53219	0.0113351	1
Anomiidae	Mytilidae	-0.149103	0.881472	1		Bullidae	Fasciolariidae	-0.397117	0.691281	1
Arcidae	Mytilidae	0.166952	0.867408	1		Calyptraeidae	Fasciolariidae	-2.34331	0.0191133	1
Astartidae	Mytilidae	-0.655775	0.511969	1		Cancellariidae	Fasciolariidae	-1.29955	0.193755	1
Cardiidae	Mytilidae	0.507116	0.612074	1		Cassidae	Fasciolariidae	-0.384791	0.700392	1
Carditidae	Mytilidae	-1.45353	0.146077	1		Conidae	Fasciolariidae	-1.48736	0.136919	1
Chamidae	Mytilidae	0.826135	0.408727	1		Architectonicidae	Hipponicidae	0.332861	0.739239	1
Crassatellidae	Mytilidae	0.239994	0.810335	1		Buccinidae	Hipponicidae	0.599877	0.548588	1
Glycymerididae	Mytilidae	-0.292025	0.770268	1		Bullidae	Hipponicidae	0.913234	0.36112	1
Limidae	Mytilidae	0.555631	0.578463	1		Calyptraeidae	Hipponicidae	0.478654	0.632185	1
Lucinidae	Mytilidae	-0.708025	0.478929	1		Cancellariidae	Hipponicidae	0.847477	0.396729	1
Anomiidae	Ostreidae	-0.651535	0.514701	1		Cassidae	Hipponicidae	1.32519	0.185107	1
Arcidae	Ostreidae	-0.77137	0.440487	1		Conidae	Hipponicidae	1.06947	0.284858	1
Astartidae	Ostreidae	-1.04047	0.298122	1		Drilliidae	Hipponicidae	-0.464981	0.641945	1
Cardiidae	Ostreidae	-0.337967	0.735388	1		Fasciolariidae	Hipponicidae	1.63364	0.102334	1
Carditidae	Ostreidae	-2.5917	0.00955036	1		Architectonicidae	Liotiidae	0.896827	0.369811	1
Chamidae	Ostreidae	0.214187	0.830401	1		Buccinidae	Liotiidae	1.63157	0.10277	1
Crassatellidae	Ostreidae	-0.323925	0.745995	1		Bullidae	Liotiidae	1.56698	0.117118	1
Glycymerididae	Ostreidae	-1.13978	0.254377	1		Calyptraeidae	Liotiidae	1.40191	0.160942	1
Limidae	Ostreidae	-0.0848667	0.932367	1		Cancellariidae	Liotiidae	1.81883	0.0689368	1
Lucinidae	Ostreidae	-1.79075	0.0733328	1		Cassidae	Liotiidae	2.43556	0.0148686	1
Mytilidae	Ostreidae	-0.74155	0.45836	1		Conidae	Liotiidae	2.29473	0.0217484	1
Anomiidae	Pectinidae	-1.28484	0.198847	1		Drilliidae	Liotiidae	0.141381	0.887569	1
Arcidae	Pectinidae	-2.0953	0.0361444	1		Hipponicidae	Liotiidae	0.512473	0.60832	1
Astartidae	Pectinidae	-1.50638	0.131969	1		Architectonicidae	Mangeliidae	1.07318	0.28319	1
Cardiidae	Pectinidae	-1.58693	0.112529	1		Buccinidae	Mangeliidae	2.14177	0.032212	1
Chamidae	Pectinidae	-0.675052	0.499643	1		Bullidae	Mangeliidae	1.78399	0.0744252	1
Crassatellidae	Pectinidae	-1.06875	0.285184	1		Calyptraeidae	Mangeliidae	1.81793	0.0690744	1
Glycymerididae	Pectinidae	-2.22876	0.0258298	1		Cancellariidae	Mangeliidae	2.24674	0.0246567	1
Limidae	Pectinidae	-0.982776	0.325718	1		Cassidae	Mangeliidae	2.94605	0.00321865	1
Mytilidae	Pectinidae	-1.71915	0.0855875	1		Conidae	Mangeliidae	2.94789	0.00319952	1
Ostreidae	Pectinidae	-1.11319	0.265627	1		Drilliidae	Mangeliidae	0.354796	0.722743	1
Anomiidae	Pinnidae	-1.84686	0.0647674	1		Hipponicidae	Mangeliidae	0.665512	0.505723	1
Arcidae	Pinnidae	-2.3821	0.0172142	1		Liotiidae	Mangeliidae	0.154259	0.877405	1
Astartidae	Pinnidae	-1.96806	0.049061	1		Architectonicidae	Muricidae	-0.155093	0.876748	1
Cardiidae	Pinnidae	-2.08591	0.0369871	1		Buccinidae	Muricidae	-0.00544952	0.995652	1
Chamidae	Pinnidae	-1.45688	0.14515	1		Bullidae	Muricidae	0.651882	0.514477	1
Crassatellidae	Pinnidae	-1.70791	0.0876533	1		Calyptraeidae	Muricidae	-0.248554	0.803706	1
Glycymerididae	Pinnidae	-2.54344	0.0109768	1		Cancellariidae	Muricidae	0.598135	0.54975	1
Limidae	Pinnidae	-1.68117	0.0927302	1		Cassidae	Muricidae	1.59951	0.109706	1
Mytilidae	Pinnidae	-2.21212	0.0269586	1		Conidae	Muricidae	1.47039	0.141455	1
Ostreidae	Pinnidae	-1.79448	0.0727373	1		Drilliidae	Muricidae	-2.34978	0.0187847	1
Pectinidae	Pinnidae	-1.09161	0.275006	1		Hipponicidae	Muricidae	-0.617917	0.53663	1
Anomiidae	Plicatulidae	-0.298822	0.765076	1		Liotiidae	Muricidae	-1.71818	0.0857646	1
Arcidae	Plicatulidae	-0.131987	0.894994	1		Mangeliidae	Muricidae	-2.30338	0.0212577	1
Astartidae	Plicatulidae	-0.722924	0.469726	1		Architectonicidae	Nassariidae	0.475019	0.634774	1
Cardiidae	Plicatulidae	0.090174	0.928149	1		Buccinidae	Nassariidae	1.17646	0.239413	1
Carditidae	Plicatulidae	-1.18341	0.236647	1		Bullidae	Nassariidae	1.20914	0.226609	1
Chamidae	Plicatulidae	0.386262	0.699302	1		Calyptraeidae	Nassariidae	0.894436	0.371088	1
Crassatellidae	Plicatulidae	-0.00808254	0.993551	1		Cancellariidae	Nassariidae	1.42533	0.154063	1
Glycymerididae	Plicatulidae	-0.423481	0.671944	1		Cassidae	Nassariidae	2.18067	0.0292082	1
Limidae	Plicatulidae	0.190486	0.848929	1		Conidae	Nassariidae	2.05902	0.0394919	1
Lucinidae	Plicatulidae	-0.688028	0.491435	1		Drilliidae	Nassariidae	-0.669345	0.503276	1
Mytilidae	Plicatulidae	-0.216877	0.828304	1		Hipponicidae	Nassariidae	0.0539794	0.956952	1
Ostreidae	Plicatulidae	0.265758	0.790426	1		Liotiidae	Nassariidae	-0.655059	0.51243	1
Pectinidae	Plicatulidae	0.893595	0.371539	1		Mangeliidae	Nassariidae	-0.927142	0.353853	1
Pinnidae	Plicatulidae	1.51952	0.128632	1		Muricidae	Nassariidae	1.29147	0.19654	1
Anomiidae	Semelidae	0.416481	0.677058	1		Architectonicidae	Naticidae	0.359064	0.719548	1
Arcidae	Semelidae	1.2466	0.212546	1		Buccinidae	Naticidae	1.21851	0.223031	1
Astartidae	Semelidae	-0.242602	0.808313	1		Bullidae	Naticidae	1.14164	0.253605	1
Cardiidae	Semelidae	1.58968	0.111906	1		Calyptraeidae	Naticidae	0.818861	0.412866	1
Carditidae	Semelidae	-0.60417	0.545731	1		Cancellariidae	Naticidae	1.44244	0.149178	1
Chamidae	Semelidae	1.6686	0.0951963	1		Cassidae	Naticidae	2.34524	0.0190146	1
Crassatellidae	Semelidae	0.916836	0.359229	1		Conidae	Naticidae	2.44629	0.0144336	1
Glycymerididae	Semelidae	0.586576	0.557488	1		Drilliidae	Naticidae	-1.10185	0.270527	1
Limidae	Semelidae	1.38128	0.167193	1		Hipponicidae	Naticidae	-0.0897659	0.928473	1
Lucinidae	Semelidae	0.258787	0.795799	1		Liotiidae	Naticidae	-0.931834	0.351422	1
Mytilidae	Semelidae	0.835089	0.403668	1		Mangeliidae	Naticidae	-1.31041	0.190059	1
Ostreidae	Semelidae	1.75809	0.0787326	1		Muricidae	Naticidae	1.45707	0.145098	1
Plicatulidae	Semelidae	0.794464	0.426925	1		Nassariidae	Naticidae	-0.261149	0.793977	1
Anomiidae	Spondylidae	-1.40232	0.16082	1		Architectonicidae	Olividae	-0.595825	0.551292	1
Arcidae	Spondylidae	-1.73136	0.0833873	1		Buccinidae	Olividae	-0.817062	0.413893	1
Astartidae	Spondylidae	-1.61662	0.10596	1		Bullidae	Olividae	0.114984	0.908458	1
Cardiidae	Spondylidae	-1.44427	0.148664	1		Calyptraeidae	Olividae	-0.907544	0.364119	1
Chamidae	Spondylidae	-0.901203	0.36748	1		Cancellariidae	Olividae	-0.276562	0.782116	1
Crassatellidae	Spondylidae	-1.2109	0.225934	1		Cassidae	Olividae	0.422745	0.672481	1
Glycymerididae	Spondylidae	-1.94402	0.0518932	1		Conidae	Olividae	-0.0813086	0.935196	1
Limidae	Spondylidae	-1.12549	0.26038	1		Drilliidae	Olividae	-2.28414	0.0223636	1
Lucinidae	Spondylidae	-2.37993	0.0173161	1		Fasciolariidae	Olividae	0.840648	0.400545	1
Mytilidae	Spondylidae	-1.63822	0.101376	1		Hipponicidae	Olividae	-1.00349	0.315622	1
Ostreidae	Spondylidae	-1.17801	0.238793	1		Liotiidae	Olividae	-1.95689	0.0503609	1
Pectinidae	Spondylidae	-0.462933	0.643413	1		Mangeliidae	Olividae	-2.36033	0.0182586	1
Pinnidae	Spondylidae	0.497011	0.619182	1		Muricidae	Olividae	-0.874318	0.381945	1
Plicatulidae	Spondylidae	-1.07498	0.282385	1		Nassariidae	Olividae	-1.59616	0.110453	1
Semelidae	Spondylidae	-2.37723	0.017443	1		Naticidae	Olividae	-1.61723	0.10583	1
Anomiidae	Tellinidae	0.220534	0.825455	1		Architectonicidae	Personidae	0.0853489	0.931984	1
Arcidae	Tellinidae	1.04821	0.294543	1		Buccinidae	Personidae	0.264744	0.791206	1
Astartidae	Tellinidae	-0.407209	0.683854	1		Bullidae	Personidae	0.665722	0.505589	1
Cardiidae	Tellinidae	1.4589	0.144593	1		Calyptraeidae	Personidae	0.154585	0.877149	1
Carditidae	Tellinidae	-1.13352	0.256997	1		Cancellariidae	Personidae	0.534396	0.593067	1
Chamidae	Tellinidae	1.52596	0.127019	1		Cassidae	Personidae	1.01211	0.311484	1
Crassatellidae	Tellinidae	0.723301	0.469495	1		Conidae	Personidae	0.731304	0.464593	1
Glycymerididae	Tellinidae	0.297039	0.766437	1		Drilliidae	Personidae	-0.784517	0.432737	1
Limidae	Tellinidae	1.20877	0.226752	1		Fasciolariidae	Personidae	1.29851	0.194113	1
Lucinidae	Tellinidae	-0.142425	0.886745	1		Hipponicidae	Personidae	-0.247512	0.804512	1
Mytilidae	Tellinidae	0.595708	0.55137	1		Liotiidae	Personidae	-0.798275	0.424711	1
Ostreidae	Tellinidae	1.64285	0.100415	1		Mangeliidae	Personidae	-0.968651	0.332719	1
Plicatulidae	Tellinidae	0.617496	0.536908	1		Muricidae	Personidae	0.273766	0.784264	1
Semelidae	Tellinidae	-0.372878	0.709239	1		Nassariidae	Personidae	-0.36706	0.713574	1
Spondylidae	Tellinidae	2.28656	0.0222213	1		Naticidae	Personidae	-0.243979	0.807247	1
Anomiidae	Veneridae	-0.586874	0.557288	1		Olividae	Personidae	0.700356	0.483705	1
Arcidae	Veneridae	-0.664886	0.506123	1		Architectonicidae	Pseudomelatomidae	0.80228	0.422391	1
Astartidae	Veneridae	-0.994212	0.32012	1		Buccinidae	Pseudomelatomidae	1.23547	0.216654	1
Cardiidae	Veneridae	-0.210511	0.833269	1		Bullidae	Pseudomelatomidae	1.38265	0.166771	1
Carditidae	Veneridae	-2.57994	0.00988185	1		Calyptraeidae	Pseudomelatomidae	1.09327	0.274276	1
Chamidae	Veneridae	0.326437	0.744094	1		Cancellariidae	Pseudomelatomidae	1.44125	0.149514	1
Crassatellidae	Veneridae	-0.242897	0.808085	1		Cassidae	Pseudomelatomidae	1.91897	0.0549884	1
Glycymerididae	Veneridae	-1.06083	0.288766	1		Conidae	Pseudomelatomidae	1.71082	0.0871146	1
Limidae	Veneridae	0.0187129	0.98507	1		Drilliidae	Pseudomelatomidae	0.141037	0.887841	1
Lucinidae	Veneridae	-1.74251	0.0814193	1		Fasciolariidae	Pseudomelatomidae	2.26924	0.0232539	1
Mytilidae	Veneridae	-0.652981	0.513769	1		Hipponicidae	Pseudomelatomidae	0.469419	0.63877	1
Ostreidae	Veneridae	0.131825	0.895123	1		Liotiidae	Pseudomelatomidae	0.0295657	0.976413	1
Pectinidae	Veneridae	1.30578	0.191627	1		Mangeliidae	Pseudomelatomidae	-0.0905933	0.927816	1
Pinnidae	Veneridae	1.91746	0.05518	1		Muricidae	Pseudomelatomidae	1.27062	0.203865	1
Plicatulidae	Veneridae	-0.195625	0.844904	1		Nassariidae	Pseudomelatomidae	0.539794	0.589339	1
Semelidae	Veneridae	-1.7034	0.0884941	1		Naticidae	Pseudomelatomidae	0.722731	0.469845	1
Spondylidae	Veneridae	1.28878	0.197474	1		Olividae	Pseudomelatomidae	1.57841	0.114471	1
Tellinidae	Veneridae	-1.58597	0.112745	1		Personidae	Pseudomelatomidae	0.716931	0.473417	1
						Architectonicidae	Ranellidae	-0.768709	0.442066	1
						Buccinidae	Ranellidae	-1.02205	0.306756	1
						Bullidae	Ranellidae	-0.0985525	0.921494	1
						Calyptraeidae	Ranellidae	-1.0964	0.272905	1
						Cancellariidae	Ranellidae	-0.536591	0.59155	1
						Cassidae	Ranellidae	0.0801402	0.936126	1
						Conidae	Ranellidae	-0.403745	0.6864	1
						Drilliidae	Ranellidae	-2.29672	0.021635	1
						Fasciolariidae	Ranellidae	0.382556	0.702049	1
						Hipponicidae	Ranellidae	-1.15306	0.248884	1
						Liotiidae	Ranellidae	-2.03986	0.0413645	1
						Mangeliidae	Ranellidae	-2.38881	0.016903	1
						Muricidae	Ranellidae	-1.07201	0.283716	1
						Nassariidae	Ranellidae	-1.70037	0.0890622	1
						Naticidae	Ranellidae	-1.70161	0.0888284	1
						Olividae	Ranellidae	-0.277666	0.781269	1
						Personidae	Ranellidae	-0.867262	0.385799	1
						Pseudomelatomidae	Ranellidae	-1.6951	0.090056	1
						Architectonicidae	Strombidae	-1.27594	0.201976	1
						Buccinidae	Strombidae	-2.30256	0.0213035	1
						Bullidae	Strombidae	-0.526684	0.598413	1
						Calyptraeidae	Strombidae	-2.23186	0.0256245	1
						Cancellariidae	Strombidae	-1.37288	0.169791	1
						Cassidae	Strombidae	-0.57668	0.564156	1
						Conidae	Strombidae	-1.46156	0.143862	1
						Fasciolariidae	Strombidae	-0.300688	0.763652	1
						Hipponicidae	Strombidae	-1.70566	0.0880707	1
						Muricidae	Strombidae	-2.5607	0.010446	1
						Nassariidae	Strombidae	-2.8753	0.0040364	1
						Olividae	Strombidae	-0.971832	0.331134	1
						Personidae	Strombidae	-1.38613	0.165708	1
						Pseudomelatomidae	Strombidae	-2.31168	0.0207952	1
						Ranellidae	Strombidae	-0.545326	0.58553	1
						Architectonicidae	Terebridae	0.0682792	0.945563	1
						Buccinidae	Terebridae	0.241632	0.809065	1
						Bullidae	Terebridae	0.648652	0.516563	1
						Calyptraeidae	Terebridae	0.132235	0.894798	1
						Cancellariidae	Terebridae	0.512804	0.608088	1
						Cassidae	Terebridae	0.990522	0.321919	1
						Conidae	Terebridae	0.707982	0.478956	1
						Drilliidae	Terebridae	-0.806554	0.419923	1
						Fasciolariidae	Terebridae	1.2754	0.202169	1
						Hipponicidae	Terebridae	-0.264582	0.791332	1
						Liotiidae	Terebridae	-0.817986	0.413365	1
						Mangeliidae	Terebridae	-0.989557	0.322391	1
						Muricidae	Terebridae	0.250032	0.802563	1
						Nassariidae	Terebridae	-0.388652	0.697534	1
						Naticidae	Terebridae	-0.266996	0.789472	1
						Olividae	Terebridae	0.679449	0.496853	1
						Personidae	Terebridae	-0.0170698	0.986381	1
						Pseudomelatomidae	Terebridae	-0.734001	0.462948	1
						Ranellidae	Terebridae	0.847551	0.396688	1
						Strombidae	Terebridae	1.36409	0.172539	1
						Architectonicidae	Tonnidae	-0.682792	0.494739	1
						Buccinidae	Tonnidae	-0.775323	0.438149	1
						Bullidae	Tonnidae	-0.102419	0.918424	1
						Calyptraeidae	Tonnidae	-0.851147	0.394688	1
						Cancellariidae	Tonnidae	-0.437233	0.661942	1
						Cassidae	Tonnidae	0.0404846	0.967707	1
						Conidae	Tonnidae	-0.318176	0.750352	1
						Drilliidae	Tonnidae	-1.77618	0.0757029	1
						Fasciolariidae	Tonnidae	0.258441	0.796067	1
						Hipponicidae	Tonnidae	-1.01565	0.309795	1
						Liotiidae	Tonnidae	-1.68525	0.0919409	1
						Mangeliidae	Tonnidae	-1.90943	0.056207	1
						Muricidae	Tonnidae	-0.79429	0.427027	1
						Nassariidae	Tonnidae	-1.33869	0.180672	1
						Naticidae	Tonnidae	-1.27974	0.200637	1
						Olividae	Tonnidae	-0.240421	0.810004	1
						Personidae	Tonnidae	-0.76814	0.442404	1
						Pseudomelatomidae	Tonnidae	-1.48507	0.137525	1
						Ranellidae	Tonnidae	-0.0197105	0.984274	1
						Strombidae	Tonnidae	0.394462	0.69324	1
						Terebridae	Tonnidae	-0.751071	0.45261	1
						Architectonicidae	Turbinellidae	-1.72585	0.0843745	1
						Bullidae	Turbinellidae	-0.958088	0.338018	1
						Cancellariidae	Turbinellidae	-2.18295	0.0290391	1
						Cassidae	Turbinellidae	-1.33082	0.183249	1
						Conidae	Turbinellidae	-2.61118	0.00902309	1
						Fasciolariidae	Turbinellidae	-1.26054	0.207473	1
						Hipponicidae	Turbinellidae	-2.16618	0.0302972	1
						Olividae	Turbinellidae	-1.67667	0.0936073	1
						Personidae	Turbinellidae	-1.83876	0.0659512	1
						Pseudomelatomidae	Turbinellidae	-2.78717	0.00531712	1
						Ranellidae	Turbinellidae	-1.12691	0.259781	1
						Strombidae	Turbinellidae	-0.763886	0.444935	1
						Terebridae	Turbinellidae	-1.81617	0.0693436	1
						Tonnidae	Turbinellidae	-0.822601	0.410735	1
						Architectonicidae	Turbinidae	0.561386	0.574534	1
						Buccinidae	Turbinidae	1.34184	0.179649	1
						Bullidae	Turbinidae	1.29551	0.195146	1
						Calyptraeidae	Turbinidae	1.04403	0.296472	1
						Cancellariidae	Turbinidae	1.56189	0.118315	1
						Cassidae	Turbinidae	2.31722	0.0204915	1
						Conidae	Turbinidae	2.22934	0.0257911	1
						Drilliidae	Turbinidae	-0.5254	0.599305	1
						Hipponicidae	Turbinidae	0.140346	0.888386	1
						Liotiidae	Turbinidae	-0.54356	0.586745	1
						Mangeliidae	Turbinidae	-0.800713	0.423298	1
						Muricidae	Turbinidae	1.47251	0.140882	1
						Nassariidae	Turbinidae	0.136558	0.89138	1
						Naticidae	Turbinidae	0.424368	0.671298	1
						Olividae	Turbinidae	1.72259	0.0849632	1
						Personidae	Turbinidae	0.453427	0.650241	1
						Pseudomelatomidae	Turbinidae	-0.453427	0.650241	1
						Ranellidae	Turbinidae	1.81187	0.070007	1
						Terebridae	Turbinidae	0.475019	0.634774	1
						Tonnidae	Turbinidae	1.42506	0.154141	1
						Architectonicidae	Turritellidae	-1.00015	0.31724	1
						Buccinidae	Turritellidae	-2.08443	0.0371213	1
						Bullidae	Turritellidae	-0.214317	0.8303	1
						Calyptraeidae	Turritellidae	-1.96712	0.0491699	1
						Cancellariidae	Turritellidae	-0.972549	0.330778	1
						Cassidae	Turritellidae	-0.0577891	0.953917	1
						Conidae	Turritellidae	-1.01349	0.310825	1
						Fasciolariidae	Turritellidae	0.447766	0.654322	1
						Hipponicidae	Turritellidae	-1.45084	0.146824	1
						Liotiidae	Turritellidae	-2.7878	0.00530665	1
						Muricidae	Turritellidae	-2.50453	0.0122613	1
						Nassariidae	Turritellidae	-2.69871	0.00696096	1
						Olividae	Turritellidae	-0.547516	0.584024	1
						Personidae	Turritellidae	-1.11571	0.264547	1
						Pseudomelatomidae	Turritellidae	-2.08644	0.036939	1
						Ranellidae	Turritellidae	-0.13418	0.89326	1
						Strombidae	Turritellidae	0.654678	0.512675	1
						Terebridae	Turritellidae	-1.0926	0.274571	1
						Tonnidae	Turritellidae	-0.0756412	0.939705	1
						Turbinellidae	Turritellidae	1.65544	0.0978361	1
						Turbinidae	Turritellidae	-2.86409	0.00418214	1
						Architectonicidae	Xenophoridae	-0.477954	0.632683	1
						Buccinidae	Xenophoridae	-0.497972	0.618504	1
						Bullidae	Xenophoridae	0.102419	0.918424	1
						Calyptraeidae	Xenophoridae	-0.582952	0.559926	1
						Cancellariidae	Xenophoridae	-0.178132	0.858619	1
						Cassidae	Xenophoridae	0.299586	0.764493	1
						Conidae	Xenophoridae	-0.0383143	0.969437	1
						Drilliidae	Xenophoridae	-1.51174	0.1306	1
						Fasciolariidae	Xenophoridae	0.535792	0.592102	1
						Hipponicidae	Xenophoridae	-0.810815	0.417472	1
						Liotiidae	Xenophoridae	-1.44872	0.147415	1
						Mangeliidae	Xenophoridae	-1.65855	0.0972058	1
						Muricidae	Xenophoridae	-0.509475	0.610419	1
						Nassariidae	Xenophoridae	-1.07959	0.280326	1
						Naticidae	Xenophoridae	-1.00354	0.315602	1
						Olividae	Xenophoridae	0.0104531	0.99166	1
						Personidae	Xenophoridae	-0.563303	0.573229	1
						Pseudomelatomidae	Xenophoridae	-1.28023	0.200463	1
						Ranellidae	Xenophoridae	0.216815	0.828352	1
						Strombidae	Xenophoridae	0.658906	0.509956	1
						Terebridae	Xenophoridae	-0.546233	0.584906	1
						Tonnidae	Xenophoridae	0.204837	0.837699	1
						Turbinellidae	Xenophoridae	1.09358	0.274141	1
						Turbinidae	Xenophoridae	-1.16596	0.243633	1
						Turritellidae	Xenophoridae	0.352992	0.724094	1

## Sheet: gastropod
Family_1	Family_2	Z	P.unadj	P.adj
Drilliidae	Turbinellidae	-4.82777	1.38071e-06	0.000448729
Naticidae	Turbinellidae	-4.5165	6.2871e-06	0.00204331
Mangeliidae	Turbinellidae	-4.47198	7.74981e-06	0.00251869
Drilliidae	Fasciolariidae	-4.10794	3.99201e-05	0.012974
Muricidae	Turbinellidae	-4.00978	6.07765e-05	0.0197524
Turbinellidae	Turbinidae	3.94778	7.88797e-05	0.0256359
Fasciolariidae	Mangeliidae	3.79951	0.000144984	0.0471198
Nassariidae	Turbinellidae	-3.79372	0.000148408	0.0482325
Drilliidae	Strombidae	-3.75969	0.000170121	0.0552894
Drilliidae	Turritellidae	-3.75395	0.00017407	0.0565728
Fasciolariidae	Naticidae	3.69523	0.000219691	0.0713996
Liotiidae	Turbinellidae	-3.67324	0.000239498	0.0778368
Mangeliidae	Strombidae	-3.61079	0.000305267	0.0992118
Mangeliidae	Turritellidae	-3.50637	0.000454257	0.147634
Buccinidae	Turbinellidae	-3.49732	0.000469958	0.152736
Naticidae	Turritellidae	-3.25825	0.00112102	0.364332
Naticidae	Strombidae	-3.24387	0.00117917	0.383232
Calyptraeidae	Turbinellidae	-3.23624	0.00121115	0.393622
Fasciolariidae	Turbinidae	3.19111	0.00141727	0.460611
Conidae	Drilliidae	3.10087	0.00192952	0.627095
Fasciolariidae	Muricidae	3.04256	0.00234574	0.762364
Fasciolariidae	Liotiidae	3.0362	0.00239578	0.77863
Fasciolariidae	Nassariidae	3.02573	0.00248034	0.80611
Strombidae	Turbinidae	3.01927	0.00253384	0.8235
Liotiidae	Strombidae	-2.98344	0.00285025	0.926331
Cassidae	Drilliidae	2.96799	0.00299755	0.974203
Architectonicidae	Buccinidae	-0.149182	0.88141	1
Architectonicidae	Bullidae	-0.580377	0.56166	1
Buccinidae	Bullidae	-0.636652	0.524352	1
Architectonicidae	Calyptraeidae	-0.042837	0.965831	1
Buccinidae	Calyptraeidae	0.215847	0.829107	1
Bullidae	Calyptraeidae	0.717055	0.47334	1
Architectonicidae	Cancellariidae	-0.42644	0.669787	1
Buccinidae	Cancellariidae	-0.549706	0.582521	1
Bullidae	Cancellariidae	0.307685	0.758322	1
Calyptraeidae	Cancellariidae	-0.666936	0.504813	1
Architectonicidae	Cassidae	-0.904162	0.36591	1
Buccinidae	Cassidae	-1.46447	0.143065	1
Bullidae	Cassidae	-0.170036	0.864981	1
Calyptraeidae	Cassidae	-1.49437	0.135078	1
Cancellariidae	Cassidae	-0.755344	0.450043	1
Architectonicidae	Conidae	-0.613867	0.539303	1
Buccinidae	Conidae	-1.19033	0.233918	1
Bullidae	Conidae	0.179079	0.857876	1
Calyptraeidae	Conidae	-1.20738	0.227284	1
Cancellariidae	Conidae	-0.27981	0.779623	1
Cassidae	Conidae	0.662269	0.507799	1
Architectonicidae	Drilliidae	0.894709	0.370943	1
Buccinidae	Drilliidae	2.10605	0.0351998	1
Bullidae	Drilliidae	1.64397	0.100182	1
Calyptraeidae	Drilliidae	1.695	0.0900754	1
Cancellariidae	Drilliidae	2.17179	0.0298717	1
Architectonicidae	Fasciolariidae	-1.18295	0.236828	1
Buccinidae	Fasciolariidae	-2.53221	0.0113346	1
Bullidae	Fasciolariidae	-0.397119	0.691279	1
Calyptraeidae	Fasciolariidae	-2.34333	0.0191124	1
Cancellariidae	Fasciolariidae	-1.29956	0.193752	1
Cassidae	Fasciolariidae	-0.384794	0.70039	1
Conidae	Fasciolariidae	-1.48951	0.136352	1
Architectonicidae	Hipponicidae	0.332863	0.739237	1
Buccinidae	Hipponicidae	0.599881	0.548585	1
Bullidae	Hipponicidae	0.91324	0.361116	1
Calyptraeidae	Hipponicidae	0.478657	0.632182	1
Cancellariidae	Hipponicidae	0.847483	0.396726	1
Cassidae	Hipponicidae	1.3252	0.185104	1
Conidae	Hipponicidae	1.06864	0.28523	1
Drilliidae	Hipponicidae	-0.464984	0.641943	1
Fasciolariidae	Hipponicidae	1.63365	0.102332	1
Architectonicidae	Liotiidae	0.896834	0.369808	1
Buccinidae	Liotiidae	1.63158	0.102767	1
Bullidae	Liotiidae	1.567	0.117116	1
Calyptraeidae	Liotiidae	1.40192	0.160939	1
Cancellariidae	Liotiidae	1.81885	0.0689348	1
Cassidae	Liotiidae	2.43558	0.0148678	1
Conidae	Liotiidae	2.29361	0.021813	1
Drilliidae	Liotiidae	0.141382	0.887568	1
Hipponicidae	Liotiidae	0.512477	0.608317	1
Architectonicidae	Mangeliidae	1.07319	0.283186	1
Buccinidae	Mangeliidae	2.14179	0.0322108	1
Bullidae	Mangeliidae	1.784	0.0744232	1
Calyptraeidae	Mangeliidae	1.81795	0.0690725	1
Cancellariidae	Mangeliidae	2.24675	0.0246557	1
Cassidae	Mangeliidae	2.94607	0.00321843	1
Conidae	Mangeliidae	2.94655	0.00321335	1
Drilliidae	Mangeliidae	0.354798	0.722741	1
Hipponicidae	Mangeliidae	0.665517	0.50572	1
Liotiidae	Mangeliidae	0.15426	0.877405	1
Architectonicidae	Muricidae	-0.155504	0.876424	1
Buccinidae	Muricidae	-0.00662495	0.994714	1
Bullidae	Muricidae	0.651478	0.514738	1
Calyptraeidae	Muricidae	-0.249484	0.802987	1
Cancellariidae	Muricidae	0.597359	0.550268	1
Cassidae	Muricidae	1.59875	0.109877	1
Conidae	Muricidae	1.46648	0.142518	1
Drilliidae	Muricidae	-2.35065	0.0187405	1
Hipponicidae	Muricidae	-0.618331	0.536357	1
Liotiidae	Muricidae	-1.71876	0.0856586	1
Mangeliidae	Muricidae	-2.30408	0.0212182	1
Architectonicidae	Nassariidae	0.475022	0.634771	1
Buccinidae	Nassariidae	1.17646	0.239409	1
Bullidae	Nassariidae	1.20915	0.226606	1
Calyptraeidae	Nassariidae	0.894443	0.371085	1
Cancellariidae	Nassariidae	1.42534	0.15406	1
Cassidae	Nassariidae	2.18068	0.029207	1
Conidae	Nassariidae	2.05752	0.0396364	1
Drilliidae	Nassariidae	-0.66935	0.503273	1
Hipponicidae	Nassariidae	0.0539798	0.956951	1
Liotiidae	Nassariidae	-0.655064	0.512427	1
Mangeliidae	Nassariidae	-0.927148	0.353849	1
Muricidae	Nassariidae	1.29226	0.196266	1
Architectonicidae	Naticidae	0.361368	0.717824	1
Buccinidae	Naticidae	1.22404	0.220937	1
Bullidae	Naticidae	1.14395	0.252645	1
Calyptraeidae	Naticidae	0.823542	0.4102	1
Cancellariidae	Naticidae	1.44653	0.148028	1
Cassidae	Naticidae	2.34934	0.0188066	1
Conidae	Naticidae	2.45005	0.0142835	1
Drilliidae	Naticidae	-1.09745	0.272444	1
Hipponicidae	Naticidae	-0.0874648	0.930302	1
Liotiidae	Naticidae	-0.928724	0.353032	1
Mangeliidae	Naticidae	-1.30675	0.191299	1
Muricidae	Naticidae	1.46479	0.142977	1
Nassariidae	Naticidae	-0.257071	0.797124	1
Architectonicidae	Olividae	-0.599314	0.548964	1
Buccinidae	Olividae	-0.823245	0.410369	1
Bullidae	Olividae	0.1115	0.91122	1
Calyptraeidae	Olividae	-0.91324	0.361116	1
Cancellariidae	Olividae	-0.281832	0.778072	1
Cassidae	Olividae	0.41748	0.676327	1
Conidae	Olividae	-0.0889884	0.929091	1
Drilliidae	Olividae	-2.28966	0.022041	1
Fasciolariidae	Olividae	0.834476	0.404013	1
Hipponicidae	Olividae	-1.00699	0.313941	1
Liotiidae	Olividae	-1.96131	0.0498432	1
Mangeliidae	Olividae	-2.36528	0.0180166	1
Muricidae	Olividae	-0.880272	0.378712	1
Nassariidae	Olividae	-1.60144	0.10928	1
Naticidae	Olividae	-1.62702	0.103734	1
Architectonicidae	Personidae	0.0768146	0.938771	1
Buccinidae	Personidae	0.25319	0.800122	1
Bullidae	Personidae	0.657192	0.511058	1
Calyptraeidae	Personidae	0.143411	0.885966	1
Cancellariidae	Personidae	0.523604	0.600554	1
Cassidae	Personidae	1.00133	0.31667	1
Conidae	Personidae	0.718815	0.472255	1
Drilliidae	Personidae	-0.795542	0.426299	1
Fasciolariidae	Personidae	1.28696	0.198108	1
Hipponicidae	Personidae	-0.256049	0.797913	1
Liotiidae	Personidae	-0.808136	0.419012	1
Mangeliidae	Personidae	-0.979111	0.327525	1
Muricidae	Personidae	0.26231	0.793083	1
Nassariidae	Personidae	-0.377859	0.705536	1
Naticidae	Personidae	-0.257791	0.796568	1
Olividae	Personidae	0.693392	0.488064	1
Architectonicidae	Pseudomelatomidae	0.802286	0.422388	1
Buccinidae	Pseudomelatomidae	1.23548	0.216651	1
Bullidae	Pseudomelatomidae	1.38266	0.166768	1
Calyptraeidae	Pseudomelatomidae	1.09328	0.274273	1
Cancellariidae	Pseudomelatomidae	1.44126	0.149511	1
Cassidae	Pseudomelatomidae	1.91898	0.0549866	1
Conidae	Pseudomelatomidae	1.71	0.0872663	1
Drilliidae	Pseudomelatomidae	0.141038	0.88784	1
Fasciolariidae	Pseudomelatomidae	2.26925	0.0232529	1
Hipponicidae	Pseudomelatomidae	0.469423	0.638768	1
Liotiidae	Pseudomelatomidae	0.029566	0.976413	1
Mangeliidae	Pseudomelatomidae	-0.0905939	0.927815	1
Muricidae	Pseudomelatomidae	1.27104	0.203716	1
Nassariidae	Pseudomelatomidae	0.539798	0.589336	1
Naticidae	Pseudomelatomidae	0.720434	0.471258	1
Olividae	Pseudomelatomidae	1.58191	0.11367	1
Personidae	Pseudomelatomidae	0.725471	0.468163	1
Architectonicidae	Ranellidae	-0.768715	0.442063	1
Buccinidae	Ranellidae	-1.02206	0.306753	1
Bullidae	Ranellidae	-0.0985532	0.921493	1
Calyptraeidae	Ranellidae	-1.0964	0.272902	1
Cancellariidae	Ranellidae	-0.536595	0.591548	1
Cassidae	Ranellidae	0.0801408	0.936125	1
Conidae	Ranellidae	-0.404889	0.685559	1
Drilliidae	Ranellidae	-2.29673	0.0216341	1
Fasciolariidae	Ranellidae	0.382559	0.702047	1
Hipponicidae	Ranellidae	-1.15307	0.248881	1
Liotiidae	Ranellidae	-2.03987	0.041363	1
Mangeliidae	Ranellidae	-2.38883	0.0169022	1
Muricidae	Ranellidae	-1.07145	0.283968	1
Nassariidae	Ranellidae	-1.70038	0.0890599	1
Naticidae	Ranellidae	-1.70474	0.0882431	1
Olividae	Ranellidae	-0.273261	0.784653	1
Personidae	Ranellidae	-0.857413	0.391217	1
Pseudomelatomidae	Ranellidae	-1.69511	0.0900537	1
Architectonicidae	Strombidae	-1.27595	0.201973	1
Buccinidae	Strombidae	-2.30258	0.0213025	1
Bullidae	Strombidae	-0.526688	0.59841	1
Calyptraeidae	Strombidae	-2.23187	0.0256234	1
Cancellariidae	Strombidae	-1.37289	0.169788	1
Cassidae	Strombidae	-0.576684	0.564153	1
Conidae	Strombidae	-1.46322	0.143406	1
Fasciolariidae	Strombidae	-0.30069	0.763651	1
Hipponicidae	Strombidae	-1.70568	0.0880684	1
Muricidae	Strombidae	-2.55986	0.0104714	1
Nassariidae	Strombidae	-2.87532	0.00403613	1
Olividae	Strombidae	-0.966329	0.333879	1
Personidae	Strombidae	-1.37512	0.169095	1
Pseudomelatomidae	Strombidae	-2.3117	0.0207943	1
Ranellidae	Strombidae	-0.54533	0.585527	1
Architectonicidae	Terebridae	0.0768146	0.938771	1
Buccinidae	Terebridae	0.25319	0.800122	1
Bullidae	Terebridae	0.657192	0.511058	1
Calyptraeidae	Terebridae	0.143411	0.885966	1
Cancellariidae	Terebridae	0.523604	0.600554	1
Cassidae	Terebridae	1.00133	0.31667	1
Conidae	Terebridae	0.718815	0.472255	1
Drilliidae	Terebridae	-0.795542	0.426299	1
Fasciolariidae	Terebridae	1.28696	0.198108	1
Hipponicidae	Terebridae	-0.256049	0.797913	1
Liotiidae	Terebridae	-0.808136	0.419012	1
Mangeliidae	Terebridae	-0.979111	0.327525	1
Muricidae	Terebridae	0.26231	0.793083	1
Nassariidae	Terebridae	-0.377859	0.705536	1
Naticidae	Terebridae	-0.257791	0.796568	1
Olividae	Terebridae	0.693392	0.488064	1
Personidae	Terebridae	0	1	1
Pseudomelatomidae	Terebridae	-0.725471	0.468163	1
Ranellidae	Terebridae	0.857413	0.391217	1
Strombidae	Terebridae	1.37512	0.169095	1
Architectonicidae	Tonnidae	-0.682796	0.494735	1
Buccinidae	Tonnidae	-0.775328	0.438146	1
Bullidae	Tonnidae	-0.102419	0.918424	1
Calyptraeidae	Tonnidae	-0.851153	0.394684	1
Cancellariidae	Tonnidae	-0.437236	0.66194	1
Cassidae	Tonnidae	0.0404849	0.967707	1
Conidae	Tonnidae	-0.319011	0.749718	1
Drilliidae	Tonnidae	-1.7762	0.0757008	1
Fasciolariidae	Tonnidae	0.258443	0.796065	1
Hipponicidae	Tonnidae	-1.01566	0.309791	1
Liotiidae	Tonnidae	-1.68526	0.0919385	1
Mangeliidae	Tonnidae	-1.90944	0.0562052	1
Muricidae	Tonnidae	-0.793886	0.427262	1
Nassariidae	Tonnidae	-1.3387	0.180669	1
Naticidae	Tonnidae	-1.28205	0.199825	1
Olividae	Tonnidae	-0.236938	0.812705	1
Personidae	Tonnidae	-0.759611	0.447487	1
Pseudomelatomidae	Tonnidae	-1.48508	0.137522	1
Ranellidae	Tonnidae	-0.0197106	0.984274	1
Strombidae	Tonnidae	0.394465	0.693238	1
Terebridae	Tonnidae	-0.759611	0.447487	1
Architectonicidae	Turbinellidae	-1.72747	0.0840824	1
Bullidae	Turbinellidae	-0.959708	0.337202	1
Cancellariidae	Turbinellidae	-2.18572	0.028836	1
Cassidae	Turbinellidae	-1.33358	0.182342	1
Conidae	Turbinellidae	-2.61678	0.00887624	1
Fasciolariidae	Turbinellidae	-1.26412	0.206187	1
Hipponicidae	Turbinellidae	-2.16781	0.030173	1
Olividae	Turbinellidae	-1.67335	0.0942586	1
Personidae	Turbinellidae	-1.82909	0.067386	1
Pseudomelatomidae	Turbinellidae	-2.7888	0.00529039	1
Ranellidae	Turbinellidae	-1.12907	0.258869	1
Strombidae	Turbinellidae	-0.766836	0.443179	1
Terebridae	Turbinellidae	-1.82909	0.067386	1
Tonnidae	Turbinellidae	-0.82422	0.409815	1
Architectonicidae	Turbinidae	0.56139	0.574532	1
Buccinidae	Turbinidae	1.34185	0.179646	1
Bullidae	Turbinidae	1.29552	0.195143	1
Calyptraeidae	Turbinidae	1.04404	0.296469	1
Cancellariidae	Turbinidae	1.5619	0.118312	1
Cassidae	Turbinidae	2.31724	0.0204906	1
Conidae	Turbinidae	2.22784	0.0258913	1
Drilliidae	Turbinidae	-0.525403	0.599303	1
Hipponicidae	Turbinidae	0.140347	0.888386	1
Liotiidae	Turbinidae	-0.543563	0.586742	1
Mangeliidae	Turbinidae	-0.800719	0.423294	1
Muricidae	Turbinidae	1.4733	0.140669	1
Nassariidae	Turbinidae	0.136559	0.891379	1
Naticidae	Turbinidae	0.42029	0.674273	1
Olividae	Turbinidae	1.72787	0.084012	1
Personidae	Turbinidae	0.464226	0.642486	1
Pseudomelatomidae	Turbinidae	-0.45343	0.650239	1
Ranellidae	Turbinidae	1.81188	0.070005	1
Terebridae	Turbinidae	0.464226	0.642486	1
Tonnidae	Turbinidae	1.42507	0.154138	1
Architectonicidae	Turritellidae	-1.00015	0.317237	1
Buccinidae	Turritellidae	-2.08444	0.0371199	1
Bullidae	Turritellidae	-0.214318	0.830299	1
Calyptraeidae	Turritellidae	-1.96713	0.0491683	1
Cancellariidae	Turritellidae	-0.972556	0.330774	1
Cassidae	Turritellidae	-0.0577896	0.953916	1
Conidae	Turritellidae	-1.01564	0.309801	1
Fasciolariidae	Turritellidae	0.447769	0.65432	1
Hipponicidae	Turritellidae	-1.45085	0.146821	1
Liotiidae	Turritellidae	-2.78782	0.00530632	1
Muricidae	Turritellidae	-2.50338	0.0123015	1
Nassariidae	Turritellidae	-2.69873	0.00696055	1
Olividae	Turritellidae	-0.541343	0.588271	1
Personidae	Turritellidae	-1.10416	0.269524	1
Pseudomelatomidae	Turritellidae	-2.08645	0.0369376	1
Ranellidae	Turritellidae	-0.134181	0.893259	1
Strombidae	Turritellidae	0.654683	0.512672	1
Terebridae	Turritellidae	-1.10416	0.269524	1
Tonnidae	Turritellidae	-0.0756418	0.939704	1
Turbinellidae	Turritellidae	1.65901	0.097113	1
Turbinidae	Turritellidae	-2.86411	0.00418187	1
Architectonicidae	Xenophoridae	-0.477958	0.63268	1
Buccinidae	Xenophoridae	-0.497975	0.618502	1
Bullidae	Xenophoridae	0.102419	0.918424	1
Calyptraeidae	Xenophoridae	-0.582956	0.559923	1
Cancellariidae	Xenophoridae	-0.178133	0.858618	1
Cassidae	Xenophoridae	0.299588	0.764491	1
Conidae	Xenophoridae	-0.0391475	0.968773	1
Drilliidae	Xenophoridae	-1.51175	0.130598	1
Fasciolariidae	Xenophoridae	0.535796	0.5921	1
Hipponicidae	Xenophoridae	-0.810821	0.417469	1
Liotiidae	Xenophoridae	-1.44873	0.147413	1
Mangeliidae	Xenophoridae	-1.65857	0.0972034	1
Muricidae	Xenophoridae	-0.509069	0.610704	1
Nassariidae	Xenophoridae	-1.0796	0.280322	1
Naticidae	Xenophoridae	-1.00585	0.31449	1
Olividae	Xenophoridae	0.0139375	0.98888	1
Personidae	Xenophoridae	-0.554772	0.579051	1
Pseudomelatomidae	Xenophoridae	-1.28024	0.20046	1
Ranellidae	Xenophoridae	0.216817	0.828351	1
Strombidae	Xenophoridae	0.658911	0.509953	1
Terebridae	Xenophoridae	-0.554772	0.579051	1
Tonnidae	Xenophoridae	0.204839	0.837698	1
Turbinellidae	Xenophoridae	1.0952	0.273431	1
Turbinidae	Xenophoridae	-1.16596	0.243629	1
Turritellidae	Xenophoridae	0.352995	0.724092	1
